# Supplementary material for: An anteromedial stabilization procedure has the most protective effect on the anterior cruciate ligament in tibial external rotation. A human knee model study
Source: Springer Nature journal article supplement (doi:10.1007/s00402-024-05357-8), 2024-05-10
Supplement: MOESM1 [file 402_2024_5357_MOESM1_ESM.pdf]

## Conflict of Interest and Authorship Conformation Form

Please check the following as appropriate:

- All authors have participated in (a) conception and design, or analysis and interpretation of the data; (b) drafting the article or revising it critically for important intellectual content; and (c) approval of the final version.
- This manuscript has not been submitted to, nor is under review at, another journal or other publishing venue.
- The authors have no affiliation with any organization with a direct or indirect financial interest in the subject matter discussed in the manuscript
- The following authors have affiliations with organizations with direct or indirect financial interest in the subject matter discussed in the manuscript:

| Author's name    | Affiliation                        |
|------------------|------------------------------------|
| Fabian Blanke    | University Rostock, Germany        |
| Matthias Boljen  | Fraunhofer Institute, Germany      |
| Christoph Lutter | University Rostock, Germany        |
| Nicola Oehler    | Hessing Stiftung Augsburg, Germany |
| Thomas Tischer   | University Rostock, Germany        |
| Stephan Vogt     | Hessing Stiftung Augsburg, Germany |
